# Supplementary material for: Modelling the Photodegradation of Marine Microplastics by Means of Infrared Spectrometry and Chemometric Techniques
Source: MDPI journal article supplement (doi:10.3390/microplastics1010013), 2022-03-04
Supplement: s1 [file s1]

# Supplementary Materials

## Modelling the photodegradation of marine microplastics by means of infrared spectrometry and chemometric techniques

Carmen Sorasan<sup>1</sup>, Fernando E. Ortega-Ojeda<sup>1,2,3</sup>, Antonio Rodríguez<sup>1</sup>, Roberto Rosal<sup>1</sup>

<sup>1</sup> Department of Chemical Engineering, Universidad de Alcala, E-28771, Alcalá de Henares, Madrid, Spain

<sup>2</sup> University Institute of Research in Police Sciences (IUICP), University of Alcalá, E-28871 Alcalá de Henares, Madrid, Spain

<sup>3</sup> Department of Computer Science, University of Alcalá, E-28871 Alcalá de Henares, Madrid, Spain

### Contents:

**Figure S1.** Degradation indexes for PE samples as a function of the years of simulated solar exposure. a) KCBI – Keto Carbonyl Bond Index; b) ECBI – Ester Carbonyl Bond Index; c) VBI – Vinyl Bond Index; d) IDBI – Internal Double Bond Index; e)  $X_c(\%)$  – Crystallinity; i) OHi-3360 – Hydroxyl Bond Index at 3360  $\text{cm}^{-1}$ ; k) OHi-3623 – Hydroxyl Bond Index at 3623  $\text{cm}^{-1}$ ; m) OHi-3637 – Hydroxyl Bond Index at 3637  $\text{cm}^{-1}$ ; and for PP samples: f) ECBI – Ester Carbonyl Index; g) MGI – Methyl Group Index; h)  $I(\%)$  – Isotacticity; j) OHi-3360 – Hydroxyl Bond Index at 3360  $\text{cm}^{-1}$ ; l) OHi-3623 – Hydroxyl Bond Index at 3623  $\text{cm}^{-1}$ ; and n) OHi-3637 – Hydroxyl Bond Index at 3637  $\text{cm}^{-1}$ . Y0 represents samples at the beginning of the runs, and YN after UVA+UVB irradiation equivalent to N years of solar exposure.

**Figure S2.** Representative FTIR spectra of PE and PP fragments before (Y0) and after (Y1-Y5) irradiation.

**Table S1.** Fourier transform infrared analysis of PE samples photodegraded for 360 h equivalent to five years of exposure. (KCBI – Keto Carbonyl Bond Index; ECBI – Ester Carbonyl Bond Index; VBI – Vinyl Bond Index; IDBI – Internal Double Bond Index); Crystallinity,  $X_c(\%)$ ; OHi – Hydroxyl Index at 3360, 3623, and 3637  $\text{cm}^{-1}$ . (Fr = fragment, Pe = pure pellet.)

**Table S2.** Fourier transform infrared analysis of PP samples photodegraded for 360 h equivalent to five years of exposure. ECI – Ester Carbonyl Index; MGI – Methyl Group Index; Isotacticity,  $I(\%)$ , OHi – Hydroxyl Index at 3360, 3623, and 3637  $\text{cm}^{-1}$ . (Fr = fragment, Pe = pure pellet.)

**Table S3.** Outliers for the box plots of Fig. S1. Nomenclature as in Tables S1 and S2.

a) KCBI – (PE)

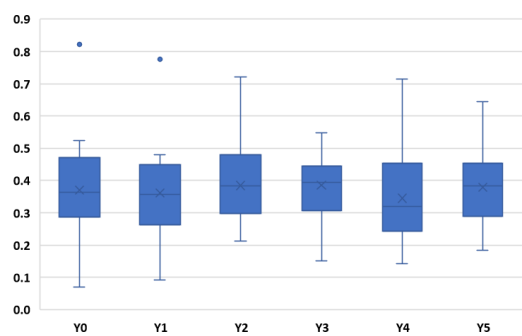

b) ECBI – (PE)

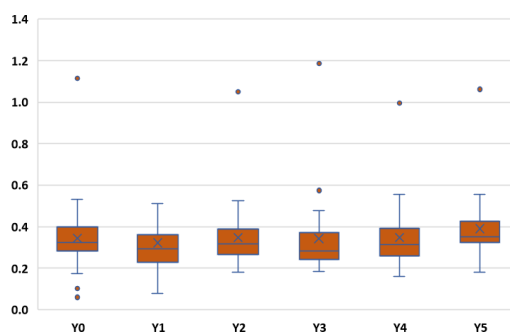

c) VBI – (PE)

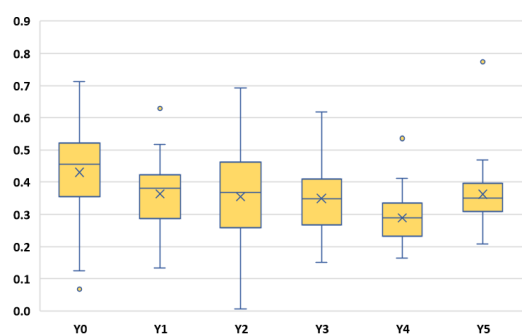

d) IDBI – (PE)

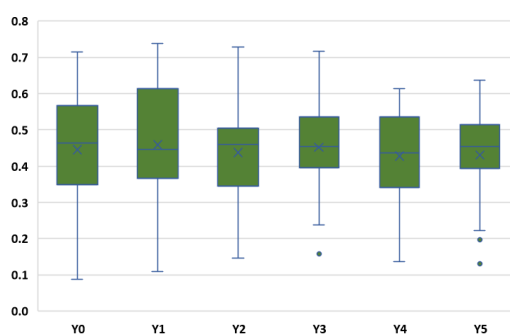

e)  $X_c(\%)$  – Crystallinity (PE)

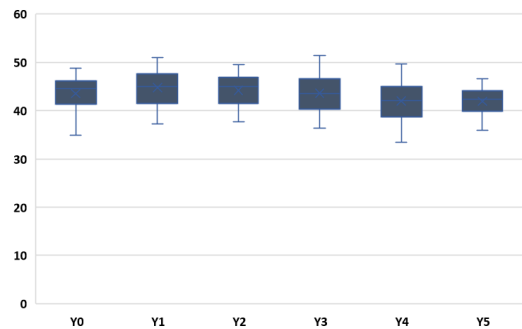

f) ECBI – (PP)

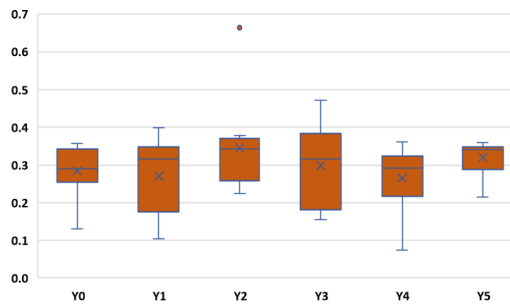

g) MGI – (PP)

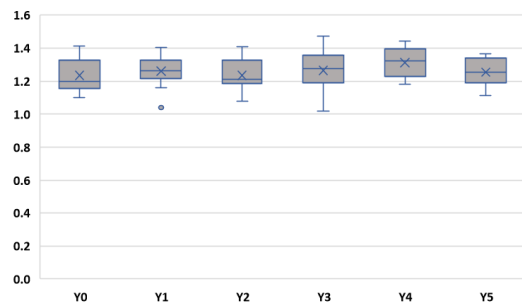

h) I(%) – Isotacticity (PP)

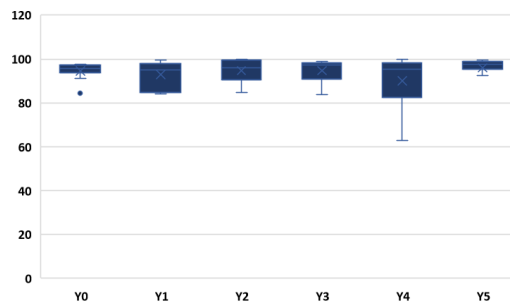

i) OHi-3360 – (PE)

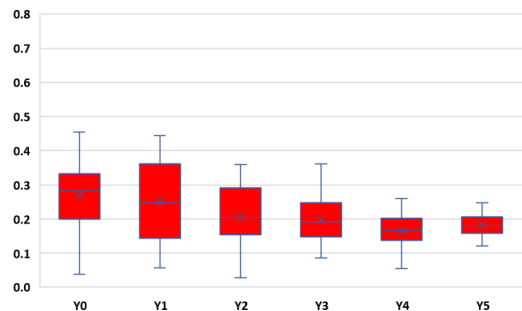

j) OHi-3360 – (PP)

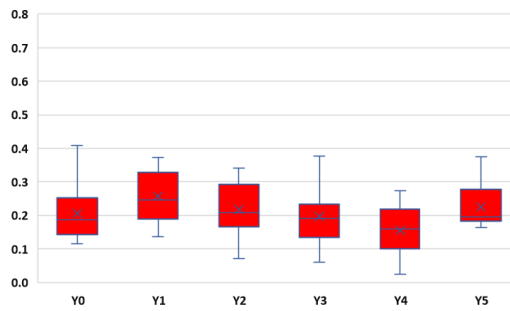

Continues in next page

k) OHi-3623 – (PE)

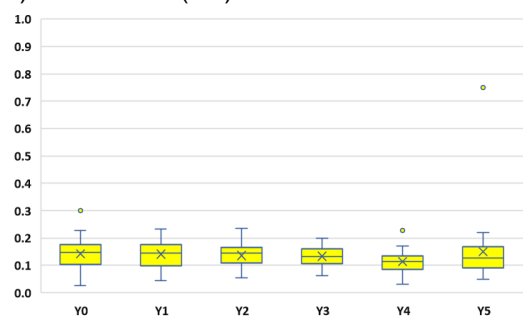

l) OHi-3623 – (PP)

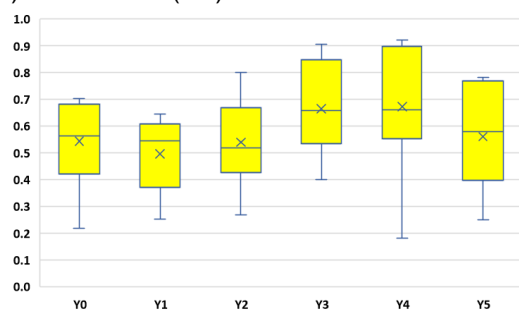

m) OHi-3637 – (PE)

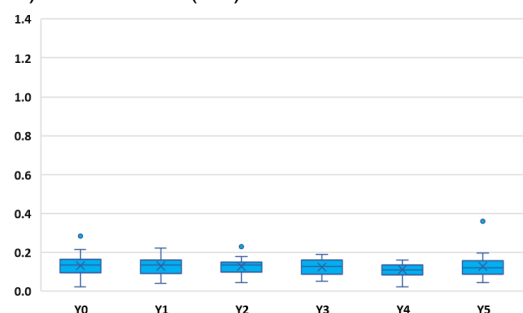

n) OHi-3637 – (PP)

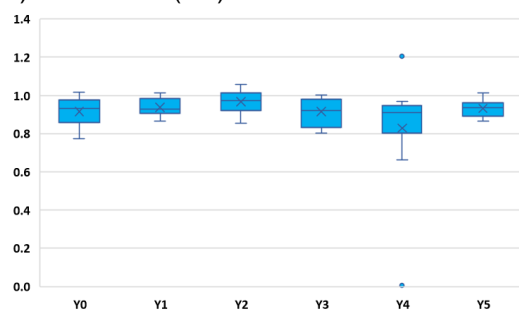

**Figure S1.** Degradation indexes for PE samples as a function of the years of simulated solar exposure. a) KCBI – Keto Carbonyl Bond Index; b) ECBI – Ester Carbonyl Bond Index; c) VBI – Vinyl Bond Index; d) IDBI – Internal Double Bond Index; e)  $X_c(\%)$  – Crystallinity; i) OHi-3360 – Hydroxyl Bond Index at  $3360\text{ cm}^{-1}$ ; k) OHi-3623 – Hydroxyl Bond Index at  $3623\text{ cm}^{-1}$ ; m) OHi-3637 – Hydroxyl Bond Index at  $3637\text{ cm}^{-1}$ ; and for PP samples: f) ECBI – Ester Carbonyl Index; g) MGI – Methyl Group Index; h)  $I(\%)$  – Isotacticity; j) OHi-3360 – Hydroxyl Bond Index at  $3360\text{ cm}^{-1}$ ; l) OHi-3623 – Hydroxyl Bond Index at  $3623\text{ cm}^{-1}$ ; and n) OHi-3637 – Hydroxyl Bond Index at  $3637\text{ cm}^{-1}$ . Y0 represents samples at the beginning of the runs, and YN after UVA+UVB irradiation equivalent to N years of solar exposure.

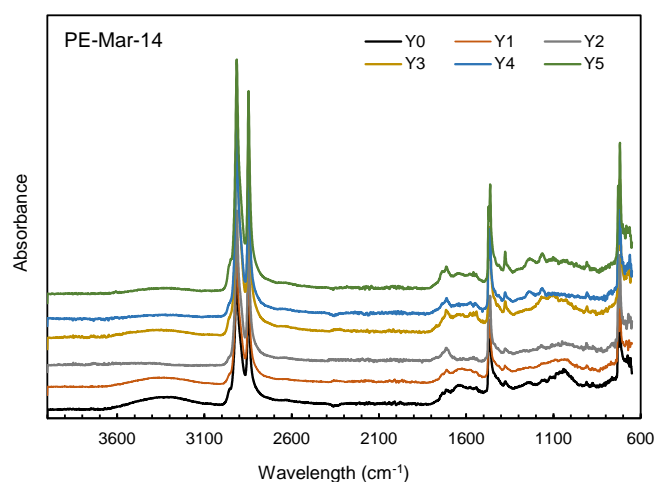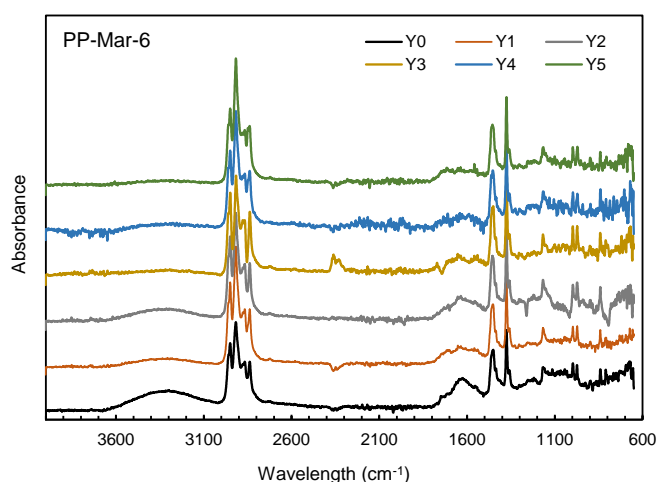

**Figure S2.** Representative FTIR spectra of PE and PP fragments before (Y0) and after (Y1-Y5) irradiation.

**Table S1.** Fourier transform infrared analysis of PE samples photodegraded for 360 h equivalent to five years of exposure. (KCBI – Keto Carbonyl Bond Index; ECBI – Ester Carbonyl Bond Index; VBI – Vinyl Bond Index; IDBI – Internal Double Bond Index); Crystallinity, X<sub>c</sub>(%); OH<sub>i</sub> – Hydroxyl Index at 3360, 3623, and 3637 cm<sup>-1</sup>. (Fr = fragment, Pe = pure pellet.)

| PE Samples | Year | KCBI   |        | ECBI   |        | VBI    |        | IDBI   |        | X <sub>c</sub> (%) |      | OHI    |        |        |        |        |        |
|------------|------|--------|--------|--------|--------|--------|--------|--------|--------|--------------------|------|--------|--------|--------|--------|--------|--------|
|            |      |        | sd±    |        | sd±    |        | sd±    |        | sd±    |                    | sd±  | 3360   | sd±    | 3623   | sd±    | 3637   | sd±    |
| HDPE-Fr    | Y0   | 0.2564 | 0.0100 | 0.2634 | 0.0496 | 0.3082 | 0.0672 | 0.2614 | 0.0251 | 42.38              | 1.21 | 0.1724 | 0.1462 | 0.1086 | 0.0404 | 0.0968 | 0.0372 |
| HDPE-Fr    | Y1   | 0.2419 | 0.0154 | 0.2165 | 0.0386 | 0.3354 | 0.0555 | 0.2663 | 0.0236 | 41.46              | 1.45 | 0.4247 | 0.0383 | 0.1434 | 0.0288 | 0.1345 | 0.0250 |
| HDPE-Fr    | Y2   | 0.2296 | 0.0159 | 0.2681 | 0.0498 | 0.2007 | 0.0764 | 0.2257 | 0.0276 | 41.47              | 1.45 | 0.1144 | 0.1434 | 0.0917 | 0.0420 | 0.0852 | 0.0380 |
| HDPE-Fr    | Y3   | 0.2336 | 0.0161 | 0.2711 | 0.0499 | 0.1868 | 0.0742 | 0.2375 | 0.0284 | 40.25              | 1.47 | 0.1037 | 0.1421 | 0.0804 | 0.0419 | 0.0787 | 0.0380 |
| HDPE-Fr    | Y4   | 0.2242 | 0.0153 | 0.3548 | 0.0236 | 0.1640 | 0.0686 | 0.2375 | 0.0284 | 38.51              | 0.83 | 0.0660 | 0.1354 | 0.0319 | 0.0289 | 0.0317 | 0.0262 |
| HDPE-Fr    | Y5   | 0.2151 | 0.0126 | 0.2725 | 0.0500 | 0.2084 | 0.0773 | 0.1965 | 0.0173 | 40.61              | 1.49 | 0.1208 | 0.1440 | 0.0691 | 0.0408 | 0.0657 | 0.0370 |
| LDPE-Pe    | Y0   | 0.0709 | 0.0476 | 0.0595 | 0.0645 | 0.0671 | 0.1004 | 0.1041 | 0.0666 | 34.87              | 1.57 | 0.0380 | 0.0426 | 0.0366 | 0.0179 | 0.0356 | 0.0184 |
| LDPE-Pe    | Y1   | 0.0920 | 0.0553 | 0.0791 | 0.0723 | 0.1329 | 0.1242 | 0.1086 | 0.0682 | 40.40              | 1.33 | 0.1168 | 0.0698 | 0.0428 | 0.0196 | 0.0399 | 0.0193 |
| LDPE-Pe    | Y2   | 0.2130 | 0.0496 | 0.2348 | 0.0744 | 0.3575 | 0.1189 | 0.2526 | 0.0711 | 37.77              | 2.09 | 0.1889 | 0.0664 | 0.0814 | 0.0163 | 0.0778 | 0.0144 |
| LDPE-Pe    | Y3   | 0.1510 | 0.0622 | 0.1871 | 0.0836 | 0.1927 | 0.1343 | 0.1577 | 0.0787 | 36.37              | 2.02 | 0.1166 | 0.0698 | 0.0626 | 0.0208 | 0.0510 | 0.0203 |
| LDPE-Pe    | Y4   | 0.1430 | 0.0623 | 0.1648 | 0.0848 | 0.3194 | 0.1284 | 0.2663 | 0.0666 | 38.30              | 2.05 | 0.2021 | 0.0632 | 0.0426 | 0.0196 | 0.0358 | 0.0184 |
| LDPE-Pe    | Y5   | 0.1956 | 0.0556 | 0.2364 | 0.0739 | 0.3440 | 0.1228 | 0.2218 | 0.0775 | 36.87              | 2.08 | 0.1906 | 0.0661 | 0.0751 | 0.0186 | 0.0696 | 0.0178 |
| LDPE-Fr    | Y0   | 0.0959 | 0.0343 | 0.1031 | 0.0586 | 0.1246 | 0.0365 | 0.0869 | 0.0156 | 35.20              | 1.65 | 0.0903 | 0.1452 | 0.0252 | 0.0287 | 0.0236 | 0.0233 |
| LDPE-Fr    | Y1   | 0.1663 | 0.0571 | 0.1663 | 0.0800 | 0.2743 | 0.0603 | 0.1524 | 0.0302 | 37.22              | 1.58 | 0.4252 | 0.1098 | 0.0933 | 0.0278 | 0.0769 | 0.0222 |
| LDPE-Fr    | Y2   | 0.2399 | 0.0476 | 0.2607 | 0.0798 | 0.2601 | 0.0632 | 0.1453 | 0.0310 | 37.73              | 1.43 | 0.1595 | 0.1573 | 0.0535 | 0.0338 | 0.0451 | 0.0269 |
| LDPE-Fr    | Y3   | 0.2282 | 0.0514 | 0.3038 | 0.0676 | 0.2779 | 0.0594 | 0.1697 | 0.0256 | 36.51              | 1.69 | 0.3616 | 0.1377 | 0.0960 | 0.0267 | 0.0776 | 0.0220 |
| LDPE-Fr    | Y4   | 0.1690 | 0.0573 | 0.2622 | 0.0795 | 0.1955 | 0.0640 | 0.1358 | 0.0314 | 33.49              | 1.00 | 0.1139 | 0.1505 | 0.0312 | 0.0305 | 0.0234 | 0.0231 |
| LDPE-Fr    | Y5   | 0.1836 | 0.0576 | 0.1811 | 0.0822 | 0.2184 | 0.0660 | 0.1298 | 0.0311 | 35.94              | 1.71 | 0.1263 | 0.1528 | 0.0487 | 0.0335 | 0.0464 | 0.0270 |
| PE-Mar-1   | Y0   | 0.2927 | 0.0449 | 0.3131 | 0.0791 | 0.4194 | 0.0403 | 0.4668 | 0.0560 | 46.20              | 1.64 | 0.2670 | 0.0332 | 0.1227 | 0.0183 | 0.1336 | 0.0220 |
| PE-Mar-1   | Y1   | 0.3287 | 0.0569 | 0.2340 | 0.0621 | 0.2640 | 0.0417 | 0.4376 | 0.0496 | 49.79              | 0.72 | 0.1089 | 0.0400 | 0.1474 | 0.0187 | 0.1338 | 0.0220 |
| PE-Mar-1   | Y2   | 0.3814 | 0.0601 | 0.3267 | 0.0794 | 0.3724 | 0.0564 | 0.4632 | 0.0555 | 47.02              | 1.70 | 0.1942 | 0.0565 | 0.1402 | 0.0196 | 0.1260 | 0.0221 |
| PE-Mar-1   | Y3   | 0.3662 | 0.0606 | 0.2751 | 0.0747 | 0.3271 | 0.0586 | 0.4648 | 0.0557 | 47.24              | 1.69 | 0.1678 | 0.0563 | 0.1106 | 0.0139 | 0.0924 | 0.0093 |
| PE-Mar-1   | Y4   | 0.4524 | 0.0388 | 0.4406 | 0.0473 | 0.3451 | 0.0590 | 0.5538 | 0.0459 | 46.19              | 1.64 | 0.1768 | 0.0568 | 0.1602 | 0.0147 | 0.1512 | 0.0186 |
| PE-Mar-1   | Y5   | 0.3819 | 0.0601 | 0.3556 | 0.0775 | 0.3145 | 0.0573 | 0.5572 | 0.0444 | 45.46              | 1.48 | 0.1814 | 0.0569 | 0.1357 | 0.0197 | 0.1378 | 0.0217 |
| PE-Mar-2   | Y0   | 0.3665 | 0.0306 | 0.3227 | 0.0663 | 0.5390 | 0.1175 | 0.5985 | 0.0654 | 44.66              | 1.56 | 0.3280 | 0.0831 | 0.1674 | 0.0295 | 0.1639 | 0.0258 |
| PE-Mar-2   | Y1   | 0.3757 | 0.0319 | 0.2885 | 0.0589 | 0.5136 | 0.1235 | 0.6409 | 0.0483 | 45.61              | 1.31 | 0.3575 | 0.0719 | 0.1725 | 0.0281 | 0.1573 | 0.0279 |
| PE-Mar-2   | Y2   | 0.3843 | 0.0323 | 0.3124 | 0.0648 | 0.3779 | 0.1283 | 0.5431 | 0.0720 | 45.12              | 1.47 | 0.2184 | 0.0939 | 0.1632 | 0.0305 | 0.1492 | 0.0296 |
| PE-Mar-2   | Y3   | 0.4299 | 0.0210 | 0.4549 | 0.0372 | 0.5503 | 0.1141 | 0.4757 | 0.0618 | 43.07              | 1.57 | 0.2487 | 0.0950 | 0.1213 | 0.0302 | 0.1040 | 0.0264 |
| PE-Mar-2   | Y4   | 0.4056 | 0.0303 | 0.3882 | 0.0650 | 0.3150 | 0.1153 | 0.4979 | 0.0676 | 42.40              | 1.42 | 0.1550 | 0.0815 | 0.1315 | 0.0318 | 0.1238 | 0.0304 |
| PE-Mar-2   | Y5   | 0.3489 | 0.0255 | 0.3384 | 0.0678 | 0.2887 | 0.1061 | 0.5039 | 0.0687 | 42.27              | 1.37 | 0.1571 | 0.0822 | 0.1013 | 0.0231 | 0.1002 | 0.0251 |
| PE-Mar-3   | Y0   | 0.2471 | 0.0326 | 0.1905 | 0.0585 | 0.2629 | 0.0525 | 0.2527 | 0.0668 | 39.73              | 1.71 | 0.1864 | 0.0190 | 0.0909 | 0.0112 | 0.0880 | 0.0065 |
| PE-Mar-3   | Y1   | 0.2528 | 0.0337 | 0.1934 | 0.0590 | 0.2472 | 0.0517 | 0.3154 | 0.0761 | 40.42              | 1.51 | 0.1591 | 0.0251 | 0.0900 | 0.0113 | 0.0795 | 0.0080 |
| PE-Mar-3   | Y2   | 0.2490 | 0.0330 | 0.1800 | 0.0566 | 0.2877 | 0.0508 | 0.2658 | 0.0702 | 38.47              | 1.83 | 0.1664 | 0.0245 | 0.0882 | 0.0115 | 0.0804 | 0.0080 |
| PE-Mar-3   | Y3   | 0.3147 | 0.0265 | 0.2426 | 0.0597 | 0.3167 | 0.0437 | 0.4105 | 0.0574 | 39.40              | 1.77 | 0.1514 | 0.0249 | 0.0941 | 0.0106 | 0.0776 | 0.0079 |
| PE-Mar-3   | Y4   | 0.2581 | 0.0345 | 0.1965 | 0.0594 | 0.1809 | 0.0265 | 0.2764 | 0.0724 | 36.20              | 1.30 | 0.1179 | 0.0136 | 0.0866 | 0.0115 | 0.0838 | 0.0076 |
| PE-Mar-3   | Y5   | 0.3103 | 0.0285 | 0.3229 | 0.0243 | 0.2864 | 0.0510 | 0.3947 | 0.0639 | 37.06              | 1.64 | 0.1572 | 0.0251 | 0.0655 | 0.0029 | 0.0668 | 0.0041 |
| PE-Mar-4   | Y0   | 0.3373 | 0.0325 | 0.3325 | 0.0356 | 0.4878 | 0.1894 | 0.4717 | 0.0508 | 44.44              | 1.73 | 0.3141 | 0.0162 | 0.1359 | 0.0224 | 0.1299 | 0.0167 |
| PE-Mar-4   | Y1   | 0.2879 | 0.0357 | 0.2416 | 0.0212 | 0.3493 | 0.1822 | 0.4229 | 0.0467 | 45.43              | 1.48 | 0.2203 | 0.0492 | 0.1169 | 0.0234 | 0.1037 | 0.0193 |
| PE-Mar-4   | Y2   | 0.3476 | 0.0288 | 0.3237 | 0.0374 | 0.4165 | 0.1895 | 0.4882 | 0.0489 | 44.39              | 1.74 | 0.2248 | 0.0493 | 0.1513 | 0.0175 | 0.1337 | 0.0153 |
| PE-Mar-4   | Y3   | 0.3114 | 0.0368 | 0.2813 | 0.0376 | 0.3766 | 0.1861 | 0.5346 | 0.0315 | 43.93              | 1.79 | 0.2216 | 0.0492 | 0.1259 | 0.0236 | 0.1031 | 0.0192 |
| PE-Mar-4   | Y4   | 0.2858 | 0.0354 | 0.3049 | 0.0393 | 0.3003 | 0.1717 | 0.4296 | 0.0482 | 41.91              | 1.55 | 0.2064 | 0.0478 | 0.1152 | 0.0233 | 0.1079 | 0.0196 |
| PE-Mar-4   | Y5   | 0.2613 | 0.0281 | 0.3282 | 0.0366 | 0.7734 | 0.0708 | 0.4190 | 0.0457 | 41.30              | 1.30 | 0.1858 | 0.0434 | 0.0889 | 0.0149 | 0.0875 | 0.0149 |
| PE-Mar-5   | Y0   | 0.3535 | 0.0378 | 0.5303 | 0.0257 | 0.4097 | 0.1090 | 0.3555 | 0.0138 | 41.44              | 1.63 | 0.2434 | 0.0598 | 0.0863 | 0.0204 | 0.0832 | 0.0161 |
| PE-Mar-5   | Y1   | 0.3396 | 0.0383 | 0.5114 | 0.0205 | 0.3794 | 0.1102 | 0.3843 | 0.0199 | 41.43              | 1.63 | 0.2323 | 0.0606 | 0.1035 | 0.0199 | 0.0945 | 0.0151 |
| PE-Mar-5   | Y2   | 0.3610 | 0.0368 | 0.5248 | 0.0248 | 0.4995 | 0.0886 | 0.3919 | 0.0192 | 41.52              | 1.61 | 0.2946 | 0.0467 | 0.1220 | 0.0133 | 0.1059 | 0.0110 |
| PE-Mar-5   | Y3   | 0.3852 | 0.0299 | 0.5745 | 0.0198 | 0.4610 | 0.1009 | 0.3860 | 0.0198 | 40.23              | 1.76 | 0.2484 | 0.0592 | 0.0913 | 0.0207 | 0.0713 | 0.0145 |
| PE-Mar-5   | Y4   | 0.3227 | 0.0370 | 0.5557 | 0.0255 | 0.2534 | 0.0858 | 0.3677 | 0.0184 | 38.77              | 1.58 | 0.1401 | 0.0400 | 0.0876 | 0.0205 | 0.0842 | 0.0161 |
| PE-Mar-5   | Y5   | 0.2859 | 0.0234 | 0.5564 | 0.0254 | 0.2759 | 0.0944 | 0.4058 | 0.0150 | 37.84              | 1.19 | 0.1828 | 0.0565 | 0.0668 | 0.0150 | 0.0670 | 0.0130 |
| PE-Mar-6   | Y0   | 0.1911 | 0.0408 | 0.2508 | 0.0845 | 0.4232 | 0.0794 | 0.3074 | 0.0365 | 43.29              | 1.53 | 0.2751 | 0.0431 | 0.0723 | 0.0199 | 0.0538 | 0.0136 |
| PE-Mar-6   | Y1   | 0.1767 | 0.0367 | 0.1843 | 0.0687 | 0.2107 |        |        |        |                    |      |        |        |        |        |        |        |

|           |    |        |        |        |        |        |        |        |        |       |      |        |        |        |        |        |        |
|-----------|----|--------|--------|--------|--------|--------|--------|--------|--------|-------|------|--------|--------|--------|--------|--------|--------|
| PE-Mar-11 | Y5 | 0.5477 | 0.0362 | 0.4944 | 0.0454 | 0.4686 | 0.0302 | 0.5736 | 0.0540 | 43.66 | 1.03 | 0.1863 | 0.0289 | 0.1581 | 0.0104 | 0.1582 | 0.0121 |
| PE-Mar-12 | Y0 | 0.3396 | 0.0387 | 0.3488 | 0.0511 | 0.5468 | 0.0626 | 0.4143 | 0.0582 | 45.87 | 1.70 | 0.3859 | 0.0566 | 0.1482 | 0.0146 | 0.1338 | 0.0151 |
| PE-Mar-12 | Y1 | 0.2631 | 0.0492 | 0.2595 | 0.0618 | 0.3552 | 0.1043 | 0.4382 | 0.0535 | 46.11 | 1.62 | 0.1844 | 0.1006 | 0.0922 | 0.0204 | 0.0799 | 0.0141 |
| PE-Mar-12 | Y2 | 0.2569 | 0.0484 | 0.2663 | 0.0624 | 0.4555 | 0.0999 | 0.3581 | 0.0572 | 44.78 | 1.87 | 0.2925 | 0.0972 | 0.1134 | 0.0237 | 0.1065 | 0.0208 |
| PE-Mar-12 | Y3 | 0.2425 | 0.0455 | 0.2040 | 0.0465 | 0.3735 | 0.1057 | 0.4342 | 0.0546 | 44.76 | 1.88 | 0.1923 | 0.1015 | 0.1293 | 0.0222 | 0.1216 | 0.0194 |
| PE-Mar-12 | Y4 | 0.2482 | 0.0468 | 0.2638 | 0.0622 | 0.2898 | 0.0906 | 0.2985 | 0.0327 | 42.45 | 1.58 | 0.1669 | 0.0978 | 0.0971 | 0.0217 | 0.1061 | 0.0208 |
| PE-Mar-12 | Y5 | 0.3375 | 0.0397 | 0.3471 | 0.0518 | 0.3221 | 0.0992 | 0.3953 | 0.0597 | 42.14 | 1.45 | 0.1457 | 0.0931 | 0.1053 | 0.0232 | 0.0990 | 0.0202 |
| PE-Mar-13 | Y0 | 0.4450 | 0.0601 | 0.3959 | 0.0614 | 0.5040 | 0.0748 | 0.4864 | 0.0911 | 45.86 | 1.05 | 0.3193 | 0.0844 | 0.1899 | 0.0241 | 0.1790 | 0.0172 |
| PE-Mar-13 | Y1 | 0.4368 | 0.0613 | 0.3933 | 0.0619 | 0.4483 | 0.0930 | 0.6989 | 0.0184 | 44.53 | 1.16 | 0.3757 | 0.0605 | 0.1743 | 0.0275 | 0.1539 | 0.0214 |
| PE-Mar-13 | Y2 | 0.4149 | 0.0627 | 0.3896 | 0.0626 | 0.3918 | 0.0992 | 0.4695 | 0.0881 | 46.46 | 0.80 | 0.2250 | 0.0930 | 0.1442 | 0.0262 | 0.1487 | 0.0210 |
| PE-Mar-13 | Y3 | 0.4364 | 0.0613 | 0.2853 | 0.0547 | 0.3461 | 0.0970 | 0.5149 | 0.0938 | 43.67 | 0.97 | 0.1685 | 0.0836 | 0.1841 | 0.0257 | 0.1726 | 0.0194 |
| PE-Mar-13 | Y4 | 0.2995 | 0.0116 | 0.2685 | 0.0472 | 0.2451 | 0.0632 | 0.5052 | 0.0932 | 44.27 | 1.12 | 0.1759 | 0.0856 | 0.1239 | 0.0183 | 0.1249 | 0.0130 |
| PE-Mar-13 | Y5 | 0.4403 | 0.0608 | 0.3818 | 0.0639 | 0.3738 | 0.0991 | 0.5069 | 0.0933 | 44.56 | 1.16 | 0.2074 | 0.0913 | 0.1621 | 0.0282 | 0.1561 | 0.0214 |
| PE-Mar-14 | Y0 | 0.3782 | 0.1278 | 0.3782 | 0.0880 | 0.4947 | 0.1213 | 0.3376 | 0.0508 | 43.00 | 2.68 | 0.3206 | 0.0411 | 0.1504 | 0.0349 | 0.1376 | 0.0229 |
| PE-Mar-14 | Y1 | 0.4735 | 0.1188 | 0.4206 | 0.0810 | 0.4090 | 0.1343 | 0.4449 | 0.0736 | 44.17 | 2.65 | 0.2322 | 0.0539 | 0.1815 | 0.0317 | 0.1619 | 0.0224 |
| PE-Mar-14 | Y2 | 0.4117 | 0.1271 | 0.3620 | 0.0889 | 0.4996 | 0.1200 | 0.4174 | 0.0731 | 46.94 | 1.85 | 0.2901 | 0.0514 | 0.1504 | 0.0349 | 0.1504 | 0.0236 |
| PE-Mar-14 | Y3 | 0.4513 | 0.1229 | 0.2708 | 0.0767 | 0.3850 | 0.1348 | 0.5318 | 0.0516 | 43.32 | 2.68 | 0.2592 | 0.0551 | 0.1990 | 0.0251 | 0.1827 | 0.0143 |
| PE-Mar-14 | Y4 | 0.1637 | 0.0372 | 0.2455 | 0.0666 | 0.1690 | 0.0619 | 0.4054 | 0.0720 | 39.46 | 1.60 | 0.2402 | 0.0547 | 0.1141 | 0.0270 | 0.1296 | 0.0212 |
| PE-Mar-14 | Y5 | 0.4438 | 0.1240 | 0.4430 | 0.0742 | 0.3682 | 0.1344 | 0.4756 | 0.0705 | 43.45 | 2.68 | 0.1782 | 0.0367 | 0.1320 | 0.0327 | 0.1285 | 0.0209 |
| PE-Mar-15 | Y0 | 0.3995 | 0.0172 | 0.3327 | 0.0215 | 0.4527 | 0.0780 | 0.5034 | 0.0172 | 41.01 | 1.09 | 0.2906 | 0.0577 | 0.1465 | 0.0276 | 0.1355 | 0.1043 |
| PE-Mar-15 | Y1 | 0.3990 | 0.0173 | 0.3274 | 0.0228 | 0.4133 | 0.0913 | 0.4788 | 0.0274 | 40.72 | 1.18 | 0.2831 | 0.0609 | 0.1568 | 0.2771 | 0.1498 | 0.1054 |
| PE-Mar-15 | Y2 | 0.3953 | 0.0177 | 0.2926 | 0.0218 | 0.2024 | 0.0672 | 0.4548 | 0.0291 | 39.92 | 1.30 | 0.1413 | 0.0665 | 0.1310 | 0.2744 | 0.1287 | 0.1036 |
| PE-Mar-15 | Y3 | 0.4000 | 0.0171 | 0.2944 | 0.0223 | 0.3506 | 0.0999 | 0.4335 | 0.0254 | 39.89 | 1.30 | 0.1952 | 0.0747 | 0.1360 | 0.2750 | 0.1309 | 0.1038 |
| PE-Mar-15 | Y4 | 0.3587 | 0.0040 | 0.2904 | 0.0212 | 0.2891 | 0.0965 | 0.4425 | 0.0277 | 38.70 | 1.18 | 0.1519 | 0.0692 | 0.1104 | 0.2718 | 0.1066 | 0.1003 |
| PE-Mar-15 | Y5 | 0.3905 | 0.0179 | 0.3353 | 0.0207 | 0.3199 | 0.0997 | 0.4474 | 0.0284 | 37.98 | 0.90 | 0.1604 | 0.0709 | 0.7499 | 0.0175 | 0.3597 | 0.0156 |
| PE-Mar-16 | Y0 | 0.5166 | 0.0348 | 0.4026 | 0.1227 | 0.5153 | 0.2245 | 0.6148 | 0.0943 | 48.78 | 3.55 | 0.3101 | 0.1443 | 0.1754 | 0.0470 | 0.1643 | 0.0400 |
| PE-Mar-16 | Y1 | 0.4404 | 0.0307 | 0.3583 | 0.1218 | 0.5026 | 0.2273 | 0.7392 | 0.0842 | 48.01 | 3.60 | 0.4445 | 0.0928 | 0.2253 | 0.0307 | 0.2031 | 0.0288 |
| PE-Mar-16 | Y2 | 0.5102 | 0.0363 | 0.3187 | 0.1168 | 0.0757 | 0.0755 | 0.7287 | 0.0872 | 49.58 | 3.43 | 0.0508 | 0.1172 | 0.1673 | 0.0477 | 0.1536 | 0.0407 |
| PE-Mar-16 | Y3 | 0.4400 | 0.0305 | 0.2317 | 0.0878 | 0.3793 | 0.2423 | 0.7168 | 0.0900 | 51.49 | 2.89 | 0.2070 | 0.1511 | 0.1559 | 0.0479 | 0.1643 | 0.0400 |
| PE-Mar-16 | Y4 | 0.4960 | 0.0385 | 0.5132 | 0.1023 | 0.3452 | 0.2429 | 0.5381 | 0.0733 | 44.05 | 3.07 | 0.1704 | 0.1483 | 0.1060 | 0.0385 | 0.1035 | 0.0315 |
| PE-Mar-16 | Y5 | 0.5027 | 0.0377 | 0.5082 | 0.1041 | 0.4087 | 0.2405 | 0.5794 | 0.0878 | 43.23 | 2.74 | 0.1734 | 0.1487 | 0.1184 | 0.0428 | 0.1149 | 0.0357 |
| PE-Mar-17 | Y0 | 0.5075 | 0.0331 | 0.3657 | 0.0688 | 0.4595 | 0.1792 | 0.5455 | 0.0177 | 47.24 | 2.06 | 0.2680 | 0.0954 | 0.1622 | 0.0259 | 0.1496 | 0.0234 |
| PE-Mar-17 | Y1 | 0.4589 | 0.0339 | 0.3392 | 0.0719 | 0.3953 | 0.1945 | 0.4976 | 0.0175 | 47.54 | 2.04 | 0.2811 | 0.0907 | 0.1753 | 0.0230 | 0.1652 | 0.0208 |
| PE-Mar-17 | Y2 | 0.4951 | 0.0353 | 0.2791 | 0.0679 | 0.0517 | 0.0963 | 0.5031 | 0.0194 | 48.48 | 1.91 | 0.0281 | 0.0833 | 0.1642 | 0.0256 | 0.1572 | 0.0226 |
| PE-Mar-17 | Y3 | 0.4859 | 0.0360 | 0.2474 | 0.0586 | 0.2572 | 0.2045 | 0.5285 | 0.0217 | 49.20 | 1.70 | 0.1379 | 0.1106 | 0.1586 | 0.0263 | 0.1590 | 0.0222 |
| PE-Mar-17 | Y4 | 0.4283 | 0.0213 | 0.2936 | 0.0703 | 0.2324 | 0.2033 | 0.5404 | 0.0194 | 46.01 | 1.97 | 0.0876 | 0.1035 | 0.1124 | 0.0166 | 0.1100 | 0.0134 |
| PE-Mar-17 | Y5 | 0.5128 | 0.0317 | 0.4248 | 0.0474 | 0.3774 | 0.1975 | 0.5155 | 0.0217 | 44.06 | 1.22 | 0.1757 | 0.1112 | 0.1306 | 0.0243 | 0.1306 | 0.0221 |
| PE-Mar-18 | Y0 | 0.4106 | 0.0387 | 0.2887 | 0.0640 | 0.4947 | 0.1493 | 0.4436 | 0.0150 | 46.32 | 2.03 | 0.3468 | 0.0532 | 0.1717 | 0.0353 | 0.1596 | 0.0303 |
| PE-Mar-18 | Y1 | 0.3943 | 0.0415 | 0.2904 | 0.0636 | 0.3972 | 0.1772 | 0.4149 | 0.0180 | 46.85 | 2.00 | 0.2632 | 0.0902 | 0.1485 | 0.0389 | 0.1388 | 0.0334 |
| PE-Mar-18 | Y2 | 0.3710 | 0.0419 | 0.1998 | 0.0610 | 0.0073 | 0.1041 | 0.4145 | 0.0180 | 47.11 | 1.97 | 0.1353 | 0.0901 | 0.1645 | 0.0369 | 0.1457 | 0.0329 |
| PE-Mar-18 | Y3 | 0.3913 | 0.0417 | 0.1821 | 0.0555 | 0.2702 | 0.1863 | 0.3997 | 0.0134 | 48.51 | 1.57 | 0.1549 | 0.0936 | 0.1642 | 0.0370 | 0.1623 | 0.0296 |
| PE-Mar-18 | Y4 | 0.3084 | 0.0153 | 0.2153 | 0.0642 | 0.2327 | 0.1840 | 0.4289 | 0.0184 | 44.68 | 1.87 | 0.1375 | 0.0906 | 0.0854 | 0.0247 | 0.0874 | 0.0221 |
| PE-Mar-18 | Y5 | 0.4054 | 0.0399 | 0.3312 | 0.0509 | 0.3392 | 0.1847 | 0.4388 | 0.0166 | 43.44 | 1.39 | 0.1584 | 0.0941 | 0.1103 | 0.0354 | 0.1072 | 0.0303 |
| PE-Mar-19 | Y0 | 0.3617 | 0.0116 | 0.2936 | 0.0186 | 0.5923 | 0.0604 | 0.5993 | 0.0257 | 44.55 | 0.51 | 0.4551 | 0.0370 | 0.2182 | 0.0104 | 0.1963 | 0.0096 |
| PE-Mar-19 | Y1 | 0.3276 | 0.0231 | 0.3224 | 0.0239 | 0.4066 | 0.1033 | 0.4465 | 0.0909 | 42.86 | 1.08 | 0.2784 | 0.0960 | 0.1625 | 0.0253 | 0.1516 | 0.0199 |
| PE-Mar-19 | Y2 | 0.3181 | 0.0228 | 0.3104 | 0.0232 | 0.4824 | 0.1015 | 0.4218 | 0.0904 | 43.13 | 1.07 | 0.2992 | 0.0963 | 0.1704 | 0.0260 | 0.1643 | 0.0207 |
| PE-Mar-19 | Y3 | 0.3124 | 0.0221 | 0.3218 | 0.0239 | 0.4442 | 0.1045 | 0.3980 | 0.0880 | 41.93 | 0.97 | 0.2821 | 0.0961 | 0.1492 | 0.0221 | 0.1414 | 0.0172 |
| PE-Mar-19 | Y4 | 0.3293 | 0.0230 | 0.3587 | 0.0122 | 0.3560 | 0.0949 | 0.3861 | 0.0860 | 42.28 | 1.04 | 0.2263 | 0.0892 | 0.1711 | 0.0260 | 0.1590 | 0.0207 |
| PE-Mar-19 | Y5 | 0.3012 | 0.0191 | 0.3199 | 0.0239 | 0.3366 | 0.0892 | 0.3883 | 0.0864 | 42.12 | 1.01 | 0.2154 | 0.0865 | 0.1756 | 0.0261 | 0.1635 | 0.0208 |
| PE-Mar-20 | Y0 | 0.4694 | 0.0173 | 0.4096 | 0.0235 | 0.5568 | 0.0643 | 0.6076 | 0.0527 | 44.62 | 0.81 | 0.3597 | 0.0502 | 0.2262 | 0.0174 | 0.2141 | 0.0187 |
| PE-Mar-20 | Y1 | 0.4801 | 0.0169 | 0.4394 | 0.0273 | 0.5166 | 0.0721 | 0.6753 | 0.0304 | 44.15 | 0.95 | 0.3478 | 0.0529 | 0.2325 | 0.0165 | 0.2246 | 0.0177 |
| PE-Mar-20 | Y2 | 0.4932 | 0.0131 | 0.4421 | 0.0272 | 0.5337 | 0.0697 | 0.6123 | 0.0523 | 44.00 | 0.97 | 0.3584 | 0.0505 | 0.2355 | 0.0158 | 0.2302 | 0.0164 |
| PE-Mar-20 | Y3 | 0.4776 | 0.0172 | 0.4767 | 0.0155 | 0.5293 | 0.0704 | 0.5771 | 0.0521 | 42.51 | 0.82 | 0.3183 | 0.0557 | 0.1965 | 0.0117 | 0.1885 | 0.0129 |
| PE-Mar-20 | Y4 | 0.4669 | 0.0171 | 0.4115 | 0.0241 | 0.4108 | 0.0579 | 0.5621 | 0.0498 | 43.61 | 1.00 | 0.2608 | 0.0470 | 0.2281 | 0.0172 | 0.2253 | 0.0176 |
| PE-Mar-20 | Y5 | 0.4469 | 0.0104 | 0.4331 | 0.0274 | 0.4087 | 0.0570 | 0.5404 | 0.0436 | 42.45 | 0.80 | 0.2478 | 0.0416 | 0.2057 | 0.0157 | 0.1980 | 0.0167 |
| PE-Mar-21 | Y0 | 0.5158 | 0.0480 | 0.4380 | 0.0332 | 0.5110 | 0.0272 | 0.5395 | 0.0527 | 38.83 | 1.61 | 0.3845 | 0.0287 | 0.2991 | 0.0498 | 0.2844 | 0.0447 |
| PE-Mar-21 | Y1 | 0.4667 | 0.0326 | 0.3070 | 0.0431 | 0.2944 | 0.0736 | 0.3988 | 0.0488 | 49.04 | 4.31 | 0.1478 | 0.0889 | 0.0992 | 0.0670 | 0.0949 | 0.0587 |
| PE-Mar-21 | Y2 | 0.5904 | 0.0378 | 0.3681 | 0.0528 | 0.3636 | 0.0836 | 0.4838 | 0.0636 | 48.99 | 4.32 | 0.1591 | 0.0913 | 0.1702 | 0.0808 | 0.1805 | 0.0739 |
| PE-Mar-21 | Y3 | 0.5471 | 0.0484 | 0.3704 | 0.0527 | 0.3567 | 0.0834 | 0.4236 | 0.0575 | 46.46 | 4.52 | 0.1891 | 0.0953 | 0.1231 | 0.0743 | 0.1326 | 0.0698 |
| PE-Mar-21 | Y4 | 0.5662 | 0.0456 | 0.3169 | 0.0464 | 0.3325 | 0.0815 | 0.5339 | 0.0547 | 49.72 | 4.18 | 0.2010 | 0.0961 | 0.2272 | 0.0772 | 0.2118 | 0.0714 |
| PE-Mar-21 | Y5 | 0.5151 | 0.0479 | 0.3771 | 0.0523 | 0.3417 | 0.0825 | 0.4637 | 0.0635 | 46.28 | 4.52 | 0.2163 | 0.0965 | 0.1754 | 0.0810 | 0.1575 | 0.0731 |
| PE-Mar-22 | Y0 | 0.8221 | 0.0572 | 1.1134 | 0.0733 | 0.7117 | 0.0933 | 0.7139 | 0.0866 | 38.92 | 0.37 | 0.3955 | 0.0709 | 0.1908 | 0.0331 | 0.1728 | 0.0309 |
| PE-Mar-22 | Y1 | 0.7758 | 0.0693 | 1.1246 | 0.0719 | 0.6289 | 0.1089 | 0.6892 | 0.0916 | 37.79 | 0.66 | 0.3729 | 0.0779 | 0.2028 | 0.0289 | 0.1880 | 0.0257 |
| PE-Mar-22 | Y2 | 0.7205 | 0.0705 | 1.0503 | 0.0715 | 0.6926 |        |        |        |       |      |        |        |        |        |        |        |



**Table S2.** Fourier transform infrared analysis of PP samples photodegraded for 360 h equivalent to five years of exposure. ECI – Ester Carbonyl Index; MGI – Methyl Group Index; Isotacticity, I(%), OHi – Hydroxyl Index at 3360, 3623, and 3637 cm<sup>-1</sup>. (Fr = fragment, Pe = pure pellet.)

| PP Samples | Year | ECI    |        | MGI    |        | I (%) |      | OHi    |        |        |        |        |        |
|------------|------|--------|--------|--------|--------|-------|------|--------|--------|--------|--------|--------|--------|
|            |      |        | sd±    |        | sd±    |       | sd±  | 3360   | sd±    | 3623   | sd±    | 3637   | sd±    |
| PP-Pe      | Y0   | 0.1304 | 0.3090 | 1.3904 | 0.1205 | 94.62 | 3.08 | 0.1152 | 0.1184 | 0.5877 | 0.2294 | 0.9135 | 0.1599 |
| PP-Pe      | Y1   | 1.0000 | 0.1257 | 1.0390 | 0.1492 | 93.10 | 3.30 | 0.3727 | 0.1186 | 0.3277 | 0.1908 | 1.0150 | 0.1462 |
| PP-Pe      | Y2   | 0.2867 | 0.3386 | 1.1957 | 0.1672 | 90.70 | 3.53 | 0.1879 | 0.1344 | 0.4440 | 0.2206 | 1.0565 | 0.1337 |
| PP-Pe      | Y3   | 0.4723 | 0.3439 | 1.0178 | 0.1427 | 92.06 | 3.41 | 0.3761 | 0.1175 | 0.6749 | 0.2214 | 0.8045 | 0.1524 |
| PP-Pe      | Y4   | 0.2447 | 0.3331 | 1.3110 | 0.1508 | 62.86 | 1.44 | 0.1079 | 0.1159 | 0.8993 | 0.1367 | 0.6643 | 0.0984 |
| PP-Pe      | Y5   | 0.3408 | 0.3433 | 1.1138 | 0.1638 | 92.35 | 3.39 | 0.3056 | 0.1337 | 0.4379 | 0.2196 | 0.9174 | 0.1598 |
| PP-Fr-1    | Y0   | 0.2551 | 0.0678 | 1.3067 | 0.0793 | 84.42 | 5.66 | 0.1359 | 0.0891 | 0.2182 | 0.0795 | 0.7775 | 0.0607 |
| PP-Fr-1    | Y1   | 0.1036 | 0.0700 | 1.2942 | 0.0795 | 84.20 | 5.66 | 0.1577 | 0.0880 | 0.2508 | 0.0827 | 0.9841 | 0.0345 |
| PP-Fr-1    | Y2   | 0.2250 | 0.0759 | 1.1761 | 0.0442 | 91.96 | 3.67 | 0.2478 | 0.0624 | 0.2687 | 0.0828 | 0.8541 | 0.0758 |
| PP-Fr-1    | Y3   | 0.1852 | 0.0803 | 1.3082 | 0.0792 | 83.76 | 5.66 | 0.0602 | 0.0801 | 0.3986 | 0.0347 | 0.8345 | 0.0745 |
| PP-Fr-1    | Y4   | 0.0736 | 0.0577 | 1.3991 | 0.0563 | 75.97 | 3.50 | 0.0244 | 0.0671 | 0.1807 | 0.0703 | 0.8491 | 0.0756 |
| PP-Fr-1    | Y5   | 0.2139 | 0.0777 | 1.2958 | 0.0795 | 84.23 | 5.66 | 0.1633 | 0.0874 | 0.2493 | 0.0827 | 0.8651 | 0.0758 |
| PP-Fr-2    | Y0   | 0.2543 | 0.0837 | 1.1877 | 0.0329 | 91.20 | 5.07 | 0.1895 | 0.1149 | 0.5401 | 0.1629 | 0.9271 | 0.0387 |
| PP-Fr-2    | Y1   | 0.1248 | 0.0621 | 1.2354 | 0.0341 | 84.38 | 4.93 | 0.1357 | 0.1132 | 0.3868 | 0.1604 | 0.9839 | 0.0166 |
| PP-Fr-2    | Y2   | 0.2427 | 0.0844 | 1.2014 | 0.0353 | 84.60 | 4.98 | 0.1362 | 0.1133 | 0.4375 | 0.1660 | 0.9007 | 0.0374 |
| PP-Fr-2    | Y3   | 0.1551 | 0.0741 | 1.2565 | 0.0276 | 87.42 | 5.33 | 0.1166 | 0.1108 | 0.7183 | 0.0986 | 0.8973 | 0.0369 |
| PP-Fr-2    | Y4   | 0.3246 | 0.0670 | 1.2324 | 0.0346 | 84.85 | 5.03 | 0.0940 | 0.1064 | 0.4725 | 0.1671 | 0.8881 | 0.0348 |
| PP-Fr-2    | Y5   | 0.2783 | 0.0805 | 1.1724 | 0.0278 | 96.31 | 2.91 | 0.3746 | 0.0353 | 0.2774 | 0.1286 | 0.9214 | 0.0389 |
| PP-Mar-1   | Y0   | 0.3429 | 0.0654 | 1.1278 | 0.0396 | 95.15 | 2.52 | 0.4081 | 0.0392 | 0.4205 | 0.1412 | 0.8867 | 0.1301 |
| PP-Mar-1   | Y1   | 0.2949 | 0.0750 | 1.2358 | 0.0666 | 96.82 | 2.44 | 0.2259 | 0.0900 | 0.5762 | 0.1702 | 0.8654 | 0.1244 |
| PP-Mar-1   | Y2   | 0.2624 | 0.0759 | 1.2242 | 0.0668 | 95.40 | 2.52 | 0.2870 | 0.0901 | 0.4641 | 0.1547 | 1.0452 | 0.1384 |
| PP-Mar-1   | Y3   | 0.1704 | 0.0518 | 1.2948 | 0.0551 | 98.19 | 2.09 | 0.1857 | 0.0829 | 0.8358 | 0.1083 | 0.9225 | 0.1369 |
| PP-Mar-1   | Y4   | 0.2216 | 0.0709 | 1.2760 | 0.0609 | 91.55 | 1.22 | 0.2350 | 0.0908 | 0.5790 | 0.1703 | 1.2046 | 0.0789 |
| PP-Mar-1   | Y5   | 0.3401 | 0.0663 | 1.1969 | 0.0649 | 96.43 | 2.48 | 0.1993 | 0.0860 | 0.6960 | 0.1614 | 1.0134 | 0.1412 |
| PP-Mar-2   | Y0   | 0.2599 | 0.1948 | 1.1005 | 0.0939 | 96.57 | 5.83 | 0.1436 | 0.0586 | 0.4193 | 0.1367 | 0.7742 | 0.0435 |
| PP-Mar-2   | Y1   | 0.1930 | 0.1851 | 1.2614 | 0.1063 | 84.67 | 3.60 | 0.2002 | 0.0513 | 0.5237 | 0.1529 | 0.9068 | 0.0676 |
| PP-Mar-2   | Y2   | 0.6638 | 0.0541 | 1.0786 | 0.0853 | 89.98 | 5.73 | 0.0699 | 0.0399 | 0.8001 | 0.0647 | 0.9513 | 0.0556 |
| PP-Mar-2   | Y3   | 0.2560 | 0.1944 | 1.2127 | 0.1104 | 99.03 | 5.27 | 0.1859 | 0.0549 | 0.4854 | 0.1497 | 0.8299 | 0.0656 |
| PP-Mar-2   | Y4   | 0.2032 | 0.1871 | 1.3321 | 0.0865 | 93.63 | 6.06 | 0.1037 | 0.0533 | 0.5889 | 0.1516 | 0.8894 | 0.0694 |
| PP-Mar-2   | Y5   | 0.3286 | 0.1972 | 1.2552 | 0.1072 | 97.55 | 5.65 | 0.1870 | 0.0547 | 0.4596 | 0.1459 | 0.8926 | 0.0692 |
| PP-Mar-3   | Y0   | 0.3580 | 0.0436 | 1.1848 | 0.0218 | 97.18 | 0.89 | 0.2541 | 0.0496 | 0.6755 | 0.1569 | 0.9650 | 0.4309 |
| PP-Mar-3   | Y1   | 0.3979 | 0.0304 | 1.2672 | 0.0236 | 97.71 | 0.84 | 0.3223 | 0.0196 | 0.5635 | 0.1358 | 0.9213 | 0.4351 |
| PP-Mar-3   | Y2   | 0.3433 | 0.0449 | 1.2283 | 0.0320 | 96.86 | 0.87 | 0.2080 | 0.0478 | 0.7743 | 0.1543 | 1.0026 | 0.4263 |
| PP-Mar-3   | Y3   | 0.3396 | 0.0450 | 1.2227 | 0.0319 | 95.76 | 0.44 | 0.2206 | 0.0496 | 0.5552 | 0.1330 | 0.9943 | 0.4274 |
| PP-Mar-3   | Y4   | 0.2952 | 0.0386 | 1.2137 | 0.0311 | 97.99 | 0.77 | 0.2129 | 0.0486 | 0.9213 | 0.1085 | 0.0069 | 0.0328 |
| PP-Mar-3   | Y5   | 0.2906 | 0.0370 | 1.2497 | 0.0297 | 97.50 | 0.87 | 0.2066 | 0.0475 | 0.7780 | 0.1538 | 0.9526 | 0.4323 |
| PP-Mar-4   | Y0   | 0.3409 | 0.0160 | 1.1654 | 0.0331 | 97.66 | 2.03 | 0.2520 | 0.0393 | 0.7025 | 0.1238 | 0.9872 | 0.0267 |
| PP-Mar-4   | Y1   | 0.3447 | 0.0170 | 1.1605 | 0.0328 | 94.14 | 0.94 | 0.3434 | 0.0346 | 0.6045 | 0.1139 | 0.9317 | 0.0212 |
| PP-Mar-4   | Y2   | 0.3678 | 0.0176 | 1.1895 | 0.0316 | 99.45 | 1.72 | 0.3411 | 0.0356 | 0.5706 | 0.1040 | 0.9642 | 0.0288 |
| PP-Mar-4   | Y3   | 0.3838 | 0.0116 | 1.1209 | 0.0191 | 97.16 | 2.03 | 0.2697 | 0.0432 | 0.6421 | 0.1206 | 1.0026 | 0.0214 |
| PP-Mar-4   | Y4   | 0.3617 | 0.0183 | 1.1792 | 0.0329 | 98.68 | 1.92 | 0.2733 | 0.0437 | 0.8607 | 0.0835 | 0.9708 | 0.0288 |
| PP-Mar-4   | Y5   | 0.3472 | 0.0175 | 1.2079 | 0.0262 | 97.55 | 2.04 | 0.2688 | 0.0431 | 0.7812 | 0.1142 | 0.9476 | 0.0267 |
| PP-Mar-5   | Y0   | 0.3150 | 0.0257 | 1.2077 | 0.0190 | 97.30 | 1.16 | 0.2138 | 0.0335 | 0.6994 | 0.1258 | 0.9747 | 0.0224 |
| PP-Mar-5   | Y1   | 0.3450 | 0.0317 | 1.3057 | 0.0605 | 99.63 | 1.20 | 0.2659 | 0.0155 | 0.6453 | 0.1147 | 0.9363 | 0.0200 |
| PP-Mar-5   | Y2   | 0.3777 | 0.0276 | 1.3264 | 0.0601 | 99.99 | 1.08 | 0.2078 | 0.0334 | 0.6343 | 0.1114 | 0.9851 | 0.0194 |
| PP-Mar-5   | Y3   | 0.3865 | 0.0242 | 1.3434 | 0.0582 | 98.60 | 1.34 | 0.2135 | 0.0335 | 0.8864 | 0.1074 | 0.9770 | 0.0219 |
| PP-Mar-5   | Y4   | 0.3241 | 0.0287 | 1.3369 | 0.0591 | 97.01 | 1.05 | 0.1794 | 0.0285 | 0.8961 | 0.1036 | 0.9398 | 0.0211 |
| PP-Mar-5   | Y5   | 0.3456 | 0.0317 | 1.3560 | 0.0557 | 98.71 | 1.34 | 0.1896 | 0.0312 | 0.7659 | 0.1292 | 0.9472 | 0.0227 |
| PP-Mar-6   | Y0   | 0.2881 | 0.0206 | 1.2722 | 0.0408 | 96.13 | 0.94 | 0.1863 | 0.0707 | 0.6362 | 0.1600 | 0.9405 | 0.0435 |
| PP-Mar-6   | Y1   | 0.3587 | 0.0256 | 1.3941 | 0.0736 | 97.97 | 1.31 | 0.3174 | 0.0169 | 0.4663 | 0.1205 | 0.9021 | 0.0392 |
| PP-Mar-6   | Y2   | 0.3421 | 0.0295 | 1.4088 | 0.0726 | 98.05 | 1.31 | 0.1755 | 0.0702 | 0.6070 | 0.1579 | 0.9866 | 0.0340 |
| PP-Mar-6   | Y3   | 0.3154 | 0.0295 | 1.4741 | 0.0551 | 97.09 | 1.25 | 0.1411 | 0.0651 | 0.9052 | 0.0877 | 0.9694 | 0.0398 |
| PP-Mar-6   | Y4   | 0.3156 | 0.0295 | 1.3927 | 0.0736 | 98.02 | 1.31 | 0.1621 | 0.0689 | 0.7016 | 0.1588 | 0.9391 | 0.0435 |
| PP-Mar-6   | Y5   | 0.3535 | 0.0272 | 1.3648 | 0.0730 | 99.67 | 0.84 | 0.1687 | 0.0697 | 0.6425 | 0.1602 | 0.8837 | 0.0324 |
| PP-Mar-7   | Y0   | 0.2933 | 0.0271 | 1.4116 | 0.0491 | 95.13 | 1.76 | 0.1622 | 0.0588 | 0.5352 | 0.0922 | 1.0182 | 0.0274 |
| PP-Mar-7   | Y1   | 0.3381 | 0.0307 | 1.4025 | 0.0502 | 96.00 | 2.08 | 0.2200 | 0.0632 | 0.6134 | 0.0826 | 0.9265 | 0.0430 |
| PP-Mar-7   | Y2   | 0.3443 | 0.0296 | 1.3260 | 0.0389 | 99.78 | 2.08 | 0.3126 | 0.0260 | 0.3936 | 0.0471 | 0.9294 | 0.0435 |
| PP-Mar-7   | Y3   | 0.3158 | 0.0315 | 1.3970 | 0.0507 | 97.19 | 2.29 | 0.1970 | 0.0634 | 0.5510 | 0.0920 | 0.9188 | 0.0413 |
| PP-Mar-7   | Y4   | 0.2897 | 0.0258 | 1.4438 | 0.0401 | 99.82 | 2.07 | 0.1570 | 0.0576 | 0.6206 | 0.0805 | 0.9348 | 0.0442 |
| PP-Mar-7   | Y5   | 0.3591 | 0.0250 | 1.3369 | 0.0432 | 99.51 | 2.15 | 0.1903 | 0.0630 | 0.5164 | 0.0914 | 0.9873 | 0.0410 |

**Table S3.** Outliers for the box plots of Fig. S1. (Nomenclature as in Tables S1 and S2.)

| Indexes      |      | Year | Sample    | Value     |
|--------------|------|------|-----------|-----------|
| PE           |      |      |           |           |
| KCBI         |      | Y0   | PE-Mar-22 | 0.8821    |
|              |      | Y1   | PE-Mar-22 | 0.7758    |
| ECBI (PE)    |      | Y0   | PE-Mar-22 | 1.1134    |
|              |      | Y0   | LDPE-Fr   | 0.1031    |
|              |      | Y0   | LDPE-Pe   | 0.0595    |
|              |      | Y2   | PE-Mar-22 | 1.0503    |
|              |      | Y3   | PE-Mar-22 | 1.1864    |
|              |      | Y3   | PE-Mar-5  | 0.5745    |
|              |      | Y4   | PE-Mar-22 | 0.9959    |
|              |      | Y5   | PE-Mar-22 | 1.0620    |
| VBI          |      | Y0   | LDPE-Pe   | 0.0671    |
|              |      | Y1   | PE-Mar-22 | 0.6289    |
|              |      | Y4   | PE-Mar-22 | 0.5357    |
|              |      | Y5   | PE-Mar-4  | 0.7734    |
| IDBI         |      | Y3   | LDPE-Pe   | 0.1577    |
|              |      | Y5   | HDPE-Fr   | 0.1965    |
|              |      | Y5   | HDPE-Fr   | 0.1298    |
| OHi          | 3360 | -    | -         | -         |
|              |      | Y0   | PE-Mar-21 | 0.2991    |
|              | 3623 | Y4   | PE-Mar-21 | 0.2272    |
|              |      | Y5   | PE-Mar-15 | 0.7499    |
|              |      | 3637 | Y0        | PE-Mar-21 |
|              | Y2   |      | PE-Mar-20 | 0.2302    |
|              | Y5   |      | PE-Mar-15 | 0.3597    |
| PP           |      |      |           |           |
| ECBI (PP)    |      | Y2   | PP-Mar-2  | 0.6638    |
| MGI          |      | Y1   | PP-Pe     | 1.0390    |
| Isotacticity |      | Y0   | PP-Fr-1   | 84.4200   |
| OHi          | 3360 | -    | -         | -         |
|              | 3623 | -    | -         | -         |
|              | 3637 | Y4   | PP-Mar-3  | 0.0069    |
|              |      | Y4   | PP-Mar-1  | 1.2046    |
